## **Period2-mediated downregulation of ERK/MAPK phosphorylation in nasopharyngeal carcinoma**

### **<Author names>**

Zhijuan Zhang<sup>1\*</sup>, Zheng Ma<sup>1\*</sup>, Jing Kang<sup>1</sup>, Jing Yang<sup>1</sup>, Qianru Xu<sup>2</sup>, Xinran Niu<sup>2</sup>, Xiaoya Luo<sup>2</sup>, Jingyuan Wang<sup>3</sup>, Hailiang Li<sup>4</sup>, Li Hou<sup>1</sup>

### **<Author affiliations>**

<sup>1</sup>Department of Otolaryngology, General Hospital of Ningxia Medical University, Yinchuan, China;

<sup>2</sup>School of Clinical Medicine, Ningxia Medical University, Yinchuan, China; <sup>3</sup>School of Clinical

Medicine, Hainan Medical College, Hainan, China; <sup>4</sup>Department of Radiotherapy, General Hospital of Ningxia Medical University, Yinchuan, China;

### **<Withdrawal statement>**

The authors have withdrawn their manuscript owing to because authors want to do further study about period2-mediated downregulation of ERK/MAPK phosphorylation in nasopharyngeal carcinoma.

Therefore, the authors do not wish this work to be cited as reference for the project. If you have any questions, please contact the corresponding author.
